# Supplementary material
Source: ML conference proceedings conference paper supplement (https://openaccess.thecvf.com/content/WACV2024/html/Kenia_Robust_TRISO-Fueled_Pebble_WACV_2024_paper.html)
Supplement: Supplementary file 1 [file Kenia_Robust_TRISO-Fueled_Pebble_WACV_2024_supplemental.zip]

| Model                       | @IoU=0.50        |                  |                  | @IoU=0.75        |                  |                  |
|-----------------------------|------------------|------------------|------------------|------------------|------------------|------------------|
|                             | Precision        | Recall           | F-Score          | Precision        | Recall           | F-Score          |
| Mask R-CNN (Ours) [7]       | $99.36 \pm 0.36$ | $99.86 \pm 0.22$ | $99.61 \pm 0.28$ | $94.30 \pm 2.65$ | $96.00 \pm 1.74$ | $95.14 \pm 2.21$ |
| F. R-CNN w/ MobileNet [6]   | $99.46 \pm 0.34$ | $99.80 \pm 0.21$ | $99.63 \pm 0.28$ | $96.58 \pm 0.94$ | $97.38 \pm 0.57$ | $96.98 \pm 0.75$ |
| RetinaNet w/ ResNet-50 [18] | $99.30 \pm 0.26$ | $99.90 \pm 0.22$ | $99.60 \pm 0.23$ | $88.94 \pm 3.68$ | $92.48 \pm 2.27$ | $90.67 \pm 2.97$ |
| SSD300 w/ VGG16 [20]        | $98.88 \pm 0.48$ | $99.88 \pm 0.16$ | $99.38 \pm 0.31$ | $88.72 \pm 1.92$ | $92.22 \pm 1.02$ | $90.43 \pm 1.47$ |
| FCOS w/ ResNet-50 [29]      | $99.38 \pm 0.31$ | $99.84 \pm 0.23$ | $99.61 \pm 0.26$ | $95.62 \pm 1.13$ | $97.30 \pm 0.86$ | $96.45 \pm 0.98$ |

Table 1. Results based on bounding box borders for our Digit Area Detection (DAD) module using various models. We calculate the precision, recall, and F-score values with Intersection over Union (IoU) thresholds of 0.50 and 0.75 for 5 trials. Afterwards, we average these values and calculate their standard deviation. The dataset is split into 5 random training and testing subsets for the 5 trials. The five compared models are trained and tested on the same subsets in every trial.

| Model                       | @IoU=0.50        |                  |                  | @IoU=0.75        |                  |                  |
|-----------------------------|------------------|------------------|------------------|------------------|------------------|------------------|
|                             | Precision        | Recall           | F-Score          | Precision        | Recall           | F-Score          |
| Mask R-CNN (Ours) [7]       | $97.94 \pm 0.46$ | $99.48 \pm 0.39$ | $98.70 \pm 0.41$ | $93.94 \pm 1.75$ | $96.22 \pm 1.22$ | $95.07 \pm 1.49$ |
| F. R-CNN w/ MobileNet [6]   | $98.42 \pm 0.95$ | $99.26 \pm 0.62$ | $98.84 \pm 0.76$ | $94.00 \pm 2.40$ | $95.90 \pm 1.49$ | $94.94 \pm 1.94$ |
| RetinaNet w/ ResNet-50 [18] | $85.32 \pm 2.06$ | $99.60 \pm 0.22$ | $91.90 \pm 1.27$ | $77.38 \pm 2.58$ | $89.60 \pm 2.28$ | $83.04 \pm 2.39$ |
| SSD300 w/ VGG16 [20]        | $96.40 \pm 1.01$ | $98.84 \pm 0.70$ | $97.60 \pm 0.82$ | $80.30 \pm 2.10$ | $84.20 \pm 2.66$ | $82.20 \pm 2.32$ |
| FCOS w/ ResNet-50 [29]      | $94.66 \pm 1.00$ | $99.38 \pm 0.27$ | $96.96 \pm 0.62$ | $86.08 \pm 3.61$ | $92.62 \pm 1.74$ | $89.22 \pm 2.73$ |

Table 2. Results based on bounding box borders for our Digit Area Orientation Alignment (DAOA) module using various models. We calculate the precision, recall, and F-score values with Intersection over Union (IoU) thresholds of 0.50 and 0.75 for 5 trials. Afterwards, we average these values and calculate their standard deviation. The dataset is split into 5 random training and testing subsets for the 5 trials. The five compared models are trained and tested on the same subsets in every trial.

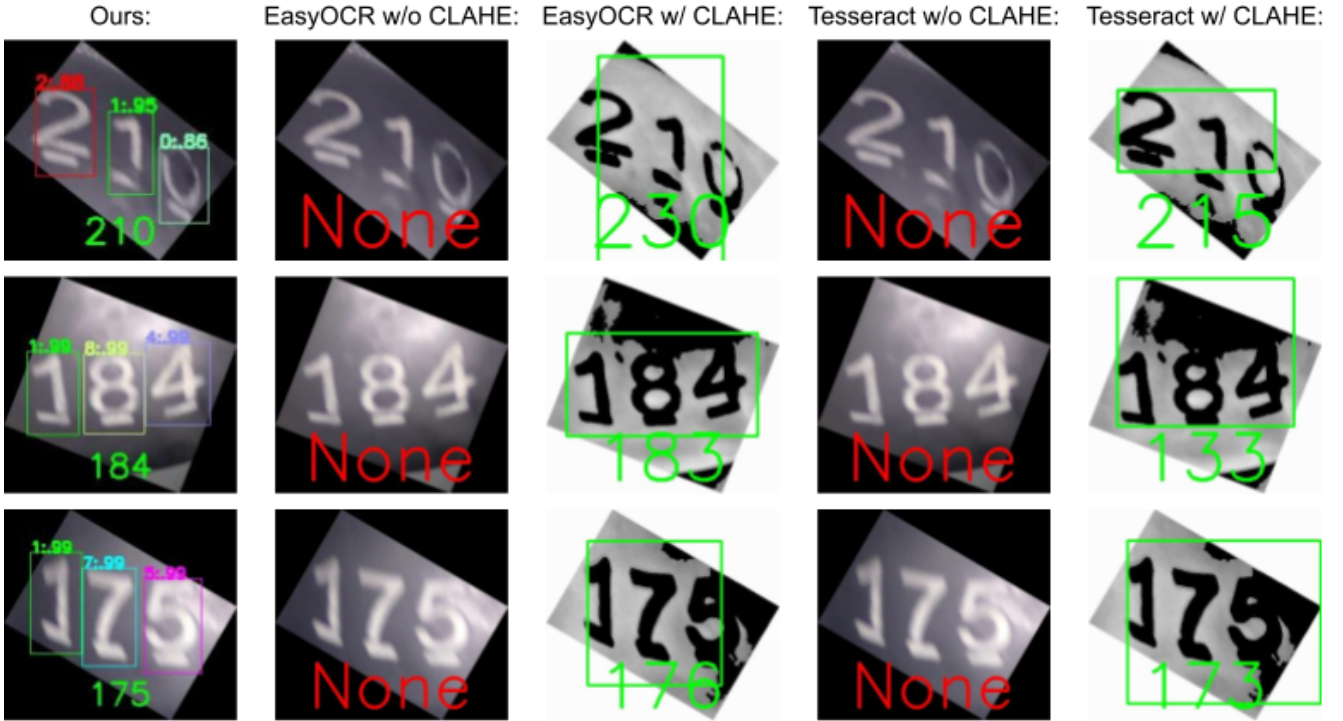

Figure 1. Column 1: Our method recognizes digits with high confidence. Column 2 and 4: EasyOCR/Tesseract recognizes nothing on the pebble digits. Column 3 and 5: Using some image preprocessing, EasyOCR/Tesseract can recognize some digits on pebbles.
