# Supplementary material
Source: ML conference proceedings conference paper supplement (https://openaccess.thecvf.com/content/WACV2024/html/Kenia_Robust_TRISO-Fueled_Pebble_WACV_2024_paper.html)
Supplement: Supplementary file 2 [file Kenia_Robust_TRISO-Fueled_Pebble_WACV_2024_supplemental.zip]

Archive with 4 entries (4 files):
- 0994-supp/Inlet Example.avi
- 0994-supp/Outlet Example.avi
- 0994-supp/README.txt
- 0994-supp/Supplemental tables and figures.pdf
